# Supplementary material for: Cerebellar lesions at a young age predict poorer long-term functional recovery
Source: PubMed Central journal article supplement — Brain Commun. 2020 Mar 6;2(1):fcaa027. doi: 10.1093/braincomms/fcaa027 (PMC7425375; doi:10.1093/braincomms/fcaa027), 2020-03-06
Supplement: fcaa027_supplementary_data.pdf [file fcaa027_supplementary_data.pdf]

# **CEREBELLAR LESIONS AT A YOUNG AGE PREDICT POORER LONG-TERM RECOVERY**

Pierre-Aurélien Beuriat, Irene Cristofori, Nathalie Richard, Lara Bardi, Celia Lorientte, Alexandru Szathmari, Federico Di Rocco, Pierre Leblond, Didier Frappaz, Cécile Faure-Contier, Line Claude, Carmine Mottolese and Michel Desmurget.

## **SUPPLEMENTARY MATERIAL**

### **Inclusion criteria.**

Being older than six years at the time of evaluation. Two main reasons account for the implementation of this inclusion criterion. First, the Purdue Pegboard Test, used to evaluate fine motor coordination, provides no normalized data for preschool children (Lafayette Instruments, 2012). Second, we were worried about test reliability in light of previous studies suggesting a high degree of inconsistency of response from test to retest in young children (Vane and Motta, 1980).

Suffering no transient post-operative complications capable of interfering with recovery, including mutism. Two main reasons account for the implementation of this inclusion criterion. First, group-pairing would have been difficult considering that CM (i) is much more commonly observed in children (around 25 %) than adults (roughly 1 %) (Catsman-Berrevoets and Patay, 2018) and (ii) is associated with lesions at numerous sites along the dento-thalamo-cortical pathway (Tamburrini *et al.*, 2015; Catsman-Berrevoets and Patay, 2018) -although other hypotheses exist (Lanier and Abrams, 2017)-. Second, the follow-up duration would have been impacted and difficult to interpret considering that CM duration is variable and lasts from a few days up to several months and even years in some cases (Catsman-Berrevoets and Patay, 2018). This would have been all the more problematical for the present study that CM duration has been reported to increase with age (Catsman-Berrevoets and Aarsen, 2010)."

**Supplementary table 1.** Characteristics of the patients (N = 45) and statistical differences between the three age group for these characteristics (last column).

| <u>Parameters</u>                                                                                                                        | <u>Measures</u>                                                                                                                  | <u>Age-group differences</u>                                                                                                              |
|------------------------------------------------------------------------------------------------------------------------------------------|----------------------------------------------------------------------------------------------------------------------------------|-------------------------------------------------------------------------------------------------------------------------------------------|
| <u>Sex</u><br>Male<br>Female                                                                                                             | <u>number (%)</u><br>21 (47 %)<br>24 (53 %)                                                                                      | Maracuillo multiple proportion test<br>non-significant (all p > .05)                                                                      |
| <u>Age at surgery (years)</u><br>Young ( $\leq 7$ )<br>Middle ( $> 7$ & $\leq 13$ )<br>Old ( $> 13$ )                                    | <u>number (%) / mean/ range</u><br>15 (33 %) / 4.6 / 0.9 - 6.9<br>15 (33 %) / 10.0 / 7.3 - 12.5<br>15 (33%) / 20.9 / 13.5 - 39.8 | ANOVA<br>significant ( $F_{(2,42)} = 32.4$ ; $p < .00001$ )                                                                               |
| <u>Follow-up</u><br>Delay from surgery to assessment (years)                                                                             | <u>mean (SD) / median</u><br>5.0 (2.9) / 4.2                                                                                     | ANOVA<br>non-significant ( $F_{(2,42)} = 1.25$ ; $p > .25$ )                                                                              |
| <u>Radiotherapy</u><br>Yes<br>No                                                                                                         | <u>number (%)</u><br>25 (56 %)<br>20 (44 %)                                                                                      | Maracuillo multiple proportion test<br>non-significant (all p > .05)                                                                      |
| <u>Tumor type</u><br>Malignant<br>(medulloblastoma, ependymoma)<br>Benign<br>(pilocytic astrocytoma,<br>hemangioblastoma, ganglioglioma) | <u>number (%)</u><br>25 (56 %)<br>20 (44 %)                                                                                      | Maracuillo multiple proportion test<br>non-significant (all p > .05)                                                                      |
| <u>Tumor volume and location</u><br>Volume (mm <sup>3</sup> )<br><br>Location<br>Vermis<br>Vermis extending to the hemisphere            | <u>mean (SD) / median</u><br>42 (31) / 36<br><br><u>number (%)</u><br>11 (24 %)<br>34 (76 %)                                     | ANOVA<br>non-significant ( $F_{(2,42)} = 0.88$ ; $p > .42$ )<br><br>Maracuillo multiple proportion test*<br>non-significant (all p > .05) |
| <u>Deep Nuclei</u><br>Preserved<br>Lesioned                                                                                              | <u>number (%)</u><br>24 (53 %)<br>21 (47 %)                                                                                      | Maracuillo multiple proportion test<br>non-significant<br>(all p > .05)                                                                   |

\* A MANOVA was also performed on the MNI coordinates (x, y, z) of the center of gravity of the lesions. Results failed to reveal any difference between age-groups ( $F_{(6,80)} = 1.57$ ,  $p = .17$ )

**Supplementary table 2.** Summary of statistical results. Significant differences are highlighted in bold ( $p < .05$ ). Duncan significant difference test was used for post-hoc comparisons (Winer, 1971). Interactions between factors were not detailed but summarized within a single line (interactions) considering that no interaction reached significance level. hrQoL: Health-related Quality of Life; PS: Performance Status; ICARS: International Cooperative Ataxia Rating Scale; Pegboard Purdue Test: PegBoard; FSIQ: Full Scale Intelligence Quotient.

|                            |                 |                        | hrQoL                                             | PS                                                | ICARS                                             | PegBoard                                            | FSIQ                                                |
|----------------------------|-----------------|------------------------|---------------------------------------------------|---------------------------------------------------|---------------------------------------------------|-----------------------------------------------------|-----------------------------------------------------|
| <b>Age at surgery</b>      | ANOVA           |                        | <b>F<sub>(2,31)</sub>= 4.50</b><br><b>p= .019</b> | <b>F<sub>(2,31)</sub>= 3.68</b><br><b>p= .037</b> | <b>F<sub>(2,31)</sub>= 4.62</b><br><b>p= .018</b> | <b>F<sub>(2,31)</sub>= 3.34</b><br><b>p= .048</b>   | <b>F<sub>(2,31)</sub>= 4.39</b><br><b>p= .021</b>   |
|                            | <i>post-hoc</i> | <i>young vs middle</i> | <i>p = .008</i>                                   | <i>p = .026</i>                                   | <i>p = .006</i>                                   | <i>p = .022</i>                                     | <i>p = .010</i>                                     |
|                            |                 | <i>young vs old</i>    | <i>p = .026</i>                                   | <i>p = .043</i>                                   | <i>p = .022</i>                                   | <i>p = .019</i>                                     | <i>p = .023</i>                                     |
|                            |                 | <i>middle vs old</i>   | <i>p = .533</i>                                   | <i>p = .747</i>                                   | <i>p = .498</i>                                   | <i>p = .862</i>                                     | <i>p = .671</i>                                     |
| <b>Nuclei preserved</b>    | ANOVA           |                        | F <sub>(1,31)</sub> = 1.46<br>p= .236             | <b>F<sub>(1,31)</sub>= 5.60</b><br><b>p= .024</b> | <b>F<sub>(1,31)</sub>= 7.97</b><br><b>p= .008</b> | <b>F<sub>(1,31)</sub>= 16.00</b><br><b>p= .0004</b> | <b>F<sub>(1,31)</sub>= 16.66</b><br><b>p= .0003</b> |
| <b>Radiation therapy</b>   | ANOVA           |                        | <b>F<sub>(1,31)</sub>= 4.34</b><br><b>p= .045</b> | F <sub>(1,31)</sub> = 1.31<br>p= .261             | F <sub>(1,31)</sub> = 2.43<br>p= .130             | <b>F<sub>(1,31)</sub>= 4.84</b><br><b>p= .035</b>   | F <sub>(1,31)</sub> = 0.02<br>p= .894               |
| <b>Lesion volume</b>       | ANOVA           |                        | F <sub>(1,31)</sub> = 2.99<br>p= .094             | F <sub>(1,31)</sub> = 0.46<br>p= .502             | F <sub>(1,31)</sub> = 0.01<br>p= .935             | F <sub>(1,31)</sub> = 0.58<br>p= .451               | F <sub>(1,31)</sub> = 3.61<br>p= .067               |
| <b>Delay to assessment</b> | ANOVA           |                        | F <sub>(1,31)</sub> = 0.41<br>p= .526             | F <sub>(1,31)</sub> = 0.41<br>p= .525             | F <sub>(1,31)</sub> = 0.39<br>p= .535             | F <sub>(1,31)</sub> = 0.01<br>p= .932               | F <sub>(1,31)</sub> = 1.60<br>p= .216               |
| <b>Interactions</b>        | ANOVA           |                        | all ps > .335                                     | all ps > .240                                     | all ps > .245                                     | all ps > .355                                       | all ps > .130                                       |

**Supplementary figure 1.** Regional distribution of lesions for each age-group of the patient sample. Lesions have been mapped on cerebellar horizontal sections using the SUIT Atlas (level of sections is shown by the blue line on the right sagittal view). For the sake of legibility, all left-sided lesions have been flipped to the right. The regional frequency of brain lesions in each cerebellar area is expressed by the color scale.

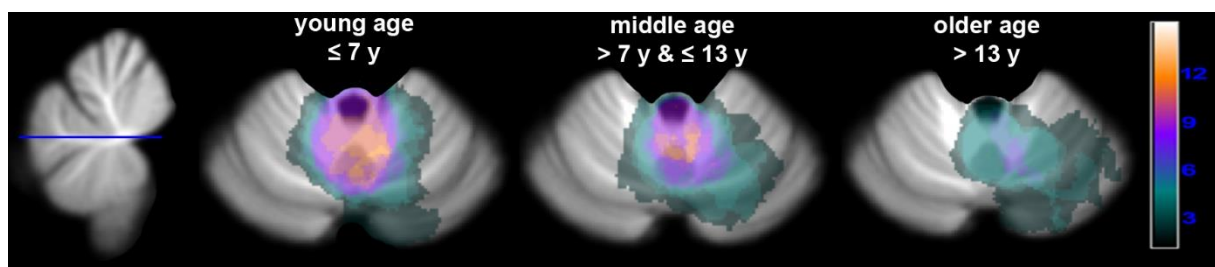

## References

- Catsman-Berrevoets C, Patay Z. Cerebellar mutism syndrome. In: Manto M, Huisman T, editors. *Handbook of Clinical Neurology*: Elsevier; 2018. p. 273-88.
- Catsman-Berrevoets CE, Aarsen FK. The spectrum of neurobehavioural deficits in the Posterior Fossa Syndrome in children after cerebellar tumour surgery. *Cortex* 2010; 46: 933-46.
- Lafayette Instruments. *Purdue Pegboard Test, User Instruction Manual*. 2012.
- Lanier JC, Abrams AN. Posterior fossa syndrome: Review of the behavioral and emotional aspects in pediatric cancer patients. [Review]. *Cancer* 2017; 123: 551-9.
- Tamburrini G, Frassanito P, Chieffo D, Massimi L, Caldarelli M, Di Rocco C. Cerebellar mutism. [Review]. *Childs Nerv Syst* 2015; 31: 1841-51.
- Vane J, Motta R. Test response inconsistency in young children. *J Sch Psychol* 1980; 18: 25-33.
- Winer BJ. *Statistical principles in experimental design*. New York: Mc Graw-Hill; 1971.
